# Supplementary material
Source: PubMed Central journal article supplement (PMC5822217)
Supplement: es7b05367_si_001.pdf [file es7b05367_si_001.pdf]

## SUPPORTING INFORMATION

# Microplastic effect thresholds for freshwater benthic macroinvertebrates

*Paula E. Redondo-Hasselerharm<sup>†\*</sup>, Dede Falahudin<sup>†</sup>, Edwin Peeters<sup>†</sup>, Albert A.*

*Koelmans<sup>†,‡</sup>*

<sup>†</sup> Aquatic Ecology and Water Quality Management group, Wageningen University & Research, P.O. Box 47, 6700 AA Wageningen, The Netherlands

<sup>‡</sup> Wageningen Marine Research, P.O. Box 68, 1970 AB IJmuiden, The Netherlands

19 pages

3 tables

7 figures

\*Corresponding author: [paula.redondohasselerharm@wur.nl](mailto:paula.redondohasselerharm@wur.nl)

**Table S1.** Calculation of the weighted average density for environmental microplastics based on data provided by Andrady *et al.*, 2011<sup>1</sup>.

A) Calculation assuming a density of 1 g/cm<sup>3</sup> for the rest fraction of 6%.

| <b>Plastic type</b>                                | <b>Density<br/>(g/cm<sup>3</sup>)<sup>a</sup></b> | <b>Fraction<br/>Produced<sup>a</sup></b> | <b>Weighted<br/>(g/cm<sup>3</sup>)</b> |
|----------------------------------------------------|---------------------------------------------------|------------------------------------------|----------------------------------------|
| LDPE                                               | 0.92                                              | 0.21                                     | 0.1932                                 |
| HDPE                                               | 0.94                                              | 0.17                                     | 0.1598                                 |
| PP                                                 | 0.84                                              | 0.24                                     | 0.2016                                 |
| PS                                                 | 1.05                                              | 0.06                                     | 0.063                                  |
| PET                                                | 1.37                                              | 0.07                                     | 0.0959                                 |
| PVC                                                | 1.38                                              | 0.19                                     | 0.2622                                 |
| REST <sup>b</sup>                                  | 1                                                 | 0.06                                     | 0.06                                   |
| <b><i>WEIGHTED AVERAGE DENSITY<sup>c</sup></i></b> |                                                   |                                          | <b>1.0357</b>                          |

<sup>a</sup> according to Table 1 in Andrady et al (2011)<sup>1</sup>

<sup>b</sup> for the REST fraction of 6% a density of 1 g/cm<sup>3</sup> was assumed

<sup>c</sup> the weighted average density is the average density of environmental microplastic, assuming all produced plastic types contribute to microplastic with weights equal to the their production fraction.

**Table S1, continued**

**B)** Calculation neglecting the unknown rest fraction by scaling the sum of the fractions for the known polymers to 100%

| <b>Plastic type</b>                                | <b>Density<br/>(g/cm<sup>3</sup>)<sup>a</sup></b> | <b>Fraction<br/>Produced<sup>a</sup></b> | <b>Weighted<br/>(g/cm<sup>3</sup>)</b> |
|----------------------------------------------------|---------------------------------------------------|------------------------------------------|----------------------------------------|
| LDPE                                               | 0.92                                              | 0.21                                     | 0.1932                                 |
| HDPE                                               | 0.94                                              | 0.17                                     | 0.1598                                 |
| PP                                                 | 0.84                                              | 0.24                                     | 0.2016                                 |
| PS                                                 | 1.05                                              | 0.06                                     | 0.063                                  |
| PET                                                | 1.37                                              | 0.07                                     | 0.0959                                 |
| PVC                                                | 1.38                                              | 0.19                                     | 0.2622                                 |
| <b><i>WEIGHTED AVERAGE DENSITY<sup>b</sup></i></b> |                                                   |                                          | <b>1.0380</b>                          |

<sup>a</sup> according to Table 1 in Andrady et al (2011)<sup>1</sup>

<sup>b</sup> the weighted average density is the average density of environmental microplastic, assuming all produced plastic types contribute to microplastic with weights equal to the their production fraction.

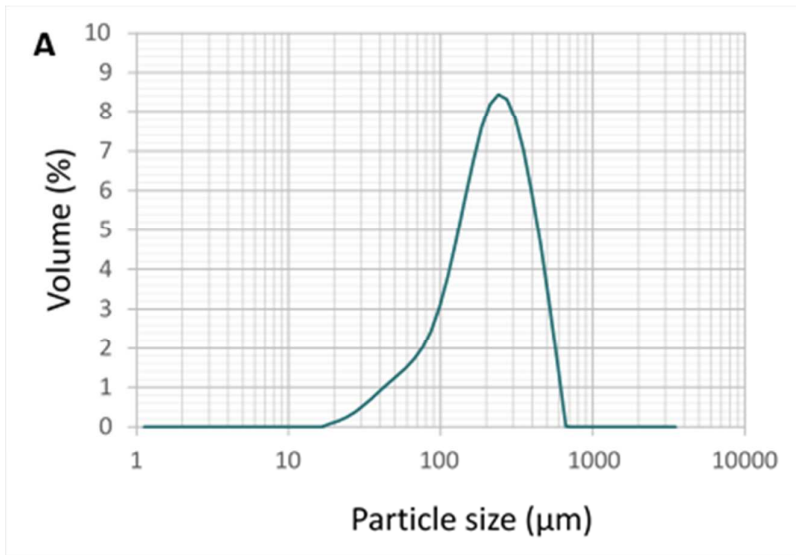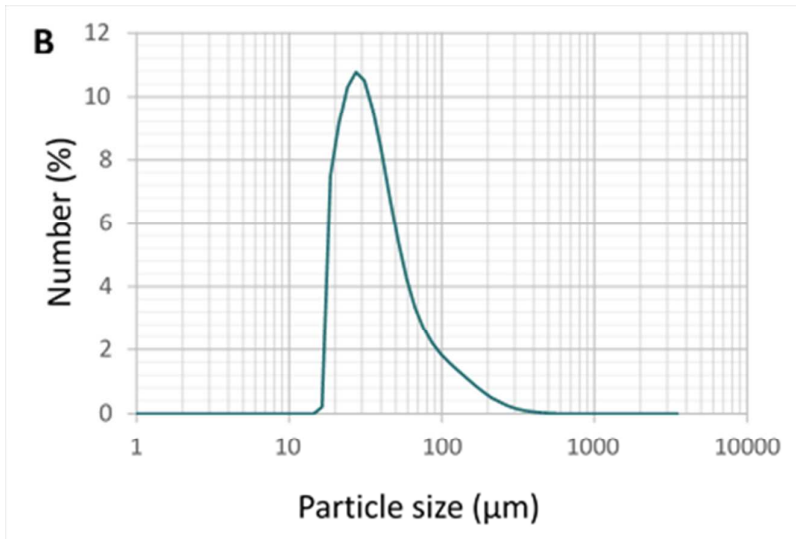

**Figure S1.** Particle Size Distribution (n=3) of the original microplastic mixture in: A) Volume %; and B) Number %.

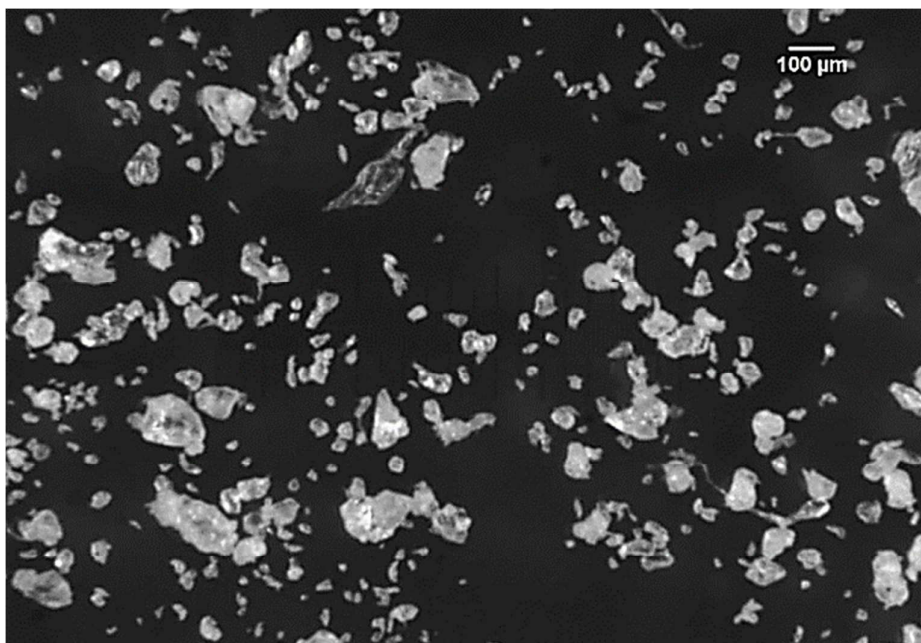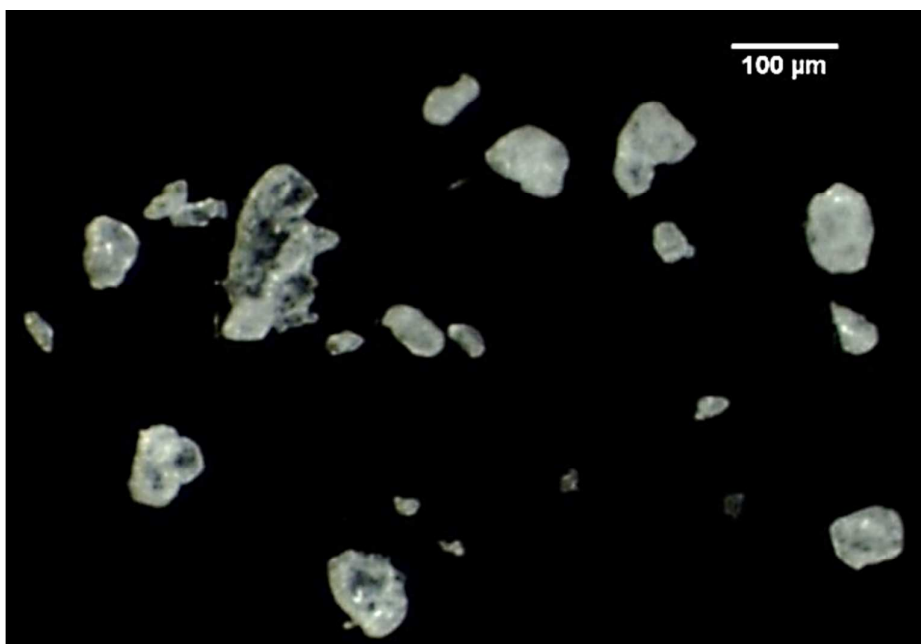

**Figure S2.** Light microscope pictures of the irregularly shaped particles (Olympus SZX10 Stereomicroscope).

**Table S2.** Background elemental concentrations of Zn, Cd, Cr, Cu, Ni and Pb in the Veenkampen sediment using A) Extraction with HNO<sub>3</sub>-HCl; B) Extraction with 0.01M CaCl<sub>2</sub>, compared to the Dutch Sediment Quality Criteria (SQC) based on Target values.

A)

|                        | <b>Zn</b><br>[mg/kg] | <b>Cd</b><br>[mg/kg] | <b>Cr</b><br>[mg/kg] | <b>Cu</b><br>[mg/kg] | <b>Ni</b><br>[mg/kg] | <b>Pb</b><br>[mg/kg] |
|------------------------|----------------------|----------------------|----------------------|----------------------|----------------------|----------------------|
| Detection limit        | 5                    | 0.05                 | 0.8                  | 3                    | 1.6                  | 0.3                  |
| Veenkampen sediment    | 75                   | 0.47                 | 47.5                 | 26                   | 31.7                 | 31.9                 |
| Dutch SQC <sup>a</sup> | 140                  | 0.8                  | 100                  | 36                   | 35                   | 85                   |

B)

|                        | <b>Zn</b><br>[mg/kg] | <b>Cd</b><br>[mg/kg] | <b>Cr</b><br>[mg/kg] | <b>Cu</b><br>[mg/kg] | <b>Ni</b><br>[mg/kg] | <b>Pb</b><br>[mg/kg] |
|------------------------|----------------------|----------------------|----------------------|----------------------|----------------------|----------------------|
| Detection limit        | 300                  | 3                    | 5                    | 400                  | 6                    | 20                   |
| Veenkampen sediment    | 11                   | 1                    | 14                   | 6                    | 16                   | 0                    |
| Dutch SQC <sup>a</sup> | 140                  | 0.8                  | 100                  | 36                   | 35                   | 85                   |

<sup>a</sup> Values giving an indication of the benchmark for environmental quality in the long term on the assumption of negligible risks to the ecosystem (background concentration of metals (Cb) presented in Table 6.2 in Lijzen *et al.*, 2001).<sup>2</sup>

**Table S3.** Water Quality Parameters (Mean±s.d.)

| <b>Species</b>       | <b>pH</b> | <b>O<sub>2</sub><br/>[mg/L]</b> | <b>EC<br/>[μS/m]</b> | <b>T<br/>[°C]</b> | <b>NH<sub>3</sub><br/>[mgN/L]</b> |
|----------------------|-----------|---------------------------------|----------------------|-------------------|-----------------------------------|
| <i>G. pulex</i>      | 7.7±0.1   | 8.8±0.1                         | 474±17               | 16.2±0.06         | 0.04±0.01                         |
| <i>H. azteca</i>     | 7.4±0.1   | 9.2±0.2                         | 409±15               | 16.0±0.04         | 0.04±0.01                         |
| <i>A. aquaticus</i>  | 7.3±0.1   | 9.0±0.1                         | 562±110              | 15.8±0.09         | n.a.                              |
| <i>S. corneum</i>    | 7.3±0.2   | 8.8±0.2                         | 473±16               | 16.7±0.08         | 0.02±0.003                        |
| <i>L. variegatus</i> | 7.2±0.1   | 8.7±0.2                         | 478±28               | 15.8±0.04         | n.a.                              |
| <i>Tubifex spp.</i>  | 7.1±0.1   | 8.8 ±0.2                        | 466±25               | 15.9±0.04         | n.a.                              |

n.a.= not analysed

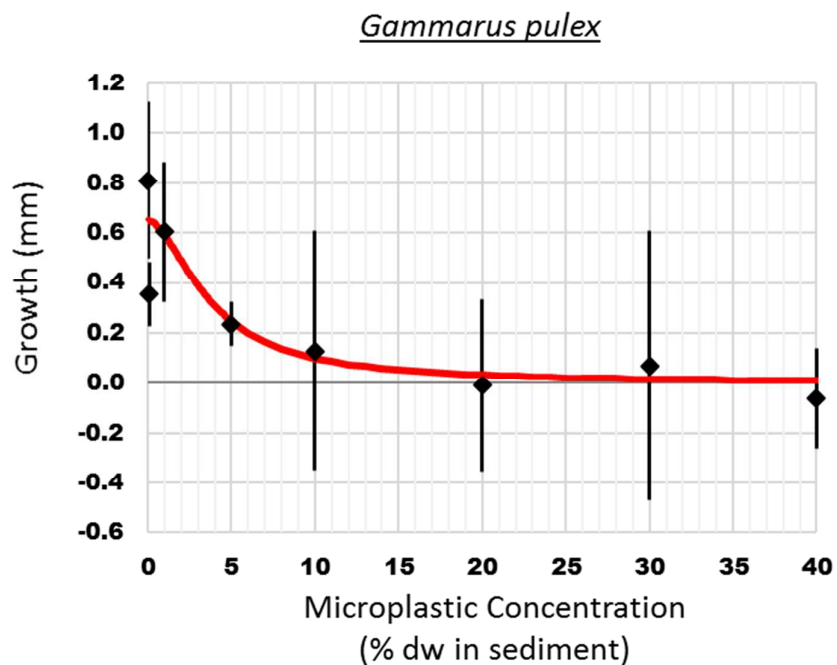

**Figure S3.** Growth of *G. pulex* as a function of polystyrene microplastic dose. The red curve relates to the best fit of the log-logistic response model (Eq. 2 in the main manuscript). The 50 % effect ( $EC_{50}$ ) is fitted at a dose of 3.57% dw. The  $EC_{10}$  was obtained by solving Eq 2 for the dose at 10% of the observed effect (1.07 % dw).



A) *Gammarus pulex*

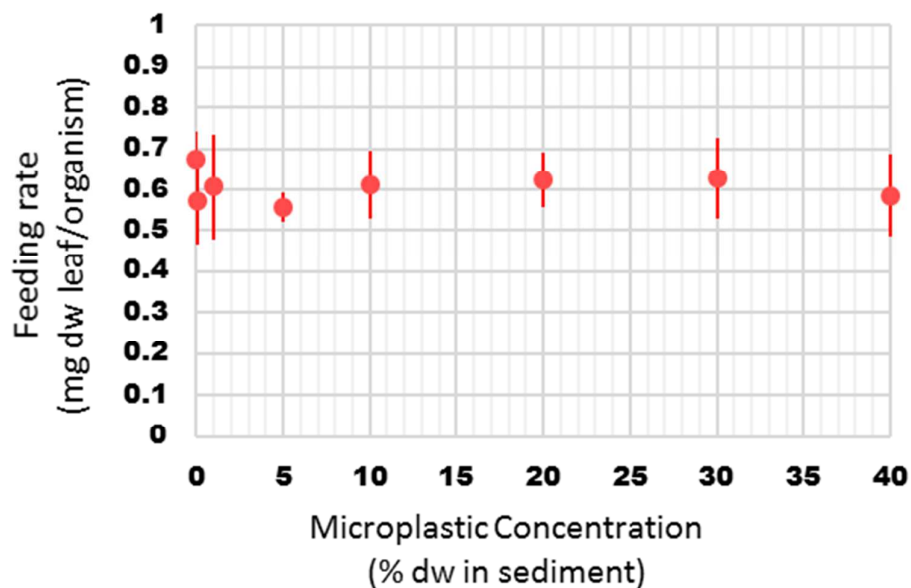

**Figure S4A.** Mean feeding rate ( $\pm$ s.d.) as mg dw of *Populus spp.* leaves consumed per organism of *G. pulex* per day during the 28-d exposure to PS microplastic concentrations ranging from 0 to 40 % in sediment (dw).

B) *Hyalella azteca*

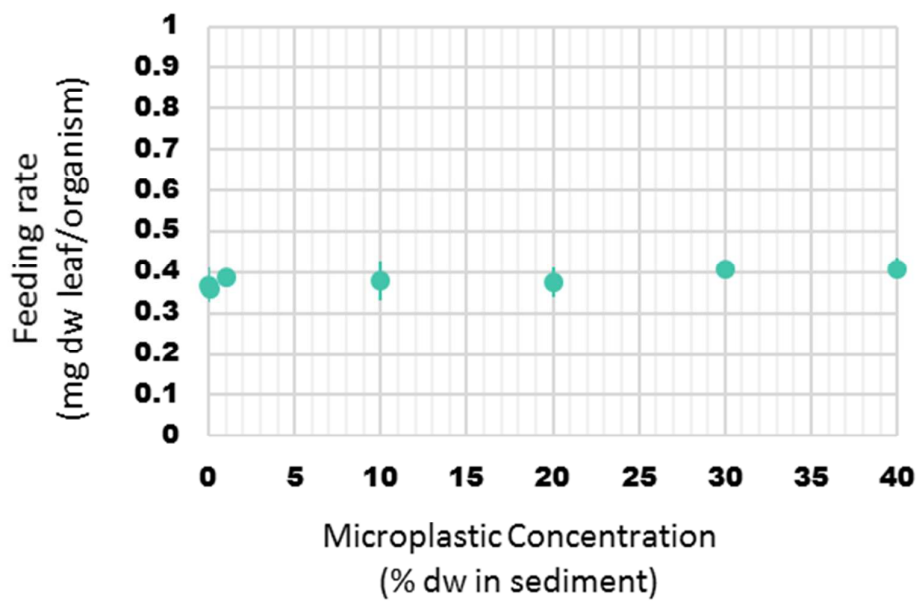

**Figure S4B.** Mean feeding rate ( $\pm$ s.d.) as mg dw of *Populus spp.* leaves consumed per organism of *H. azteca* per day during the 28-d exposure to PS microplastic concentrations ranging from 0 to 40 % in sediment (dw).

C) *Asellus aquaticus*

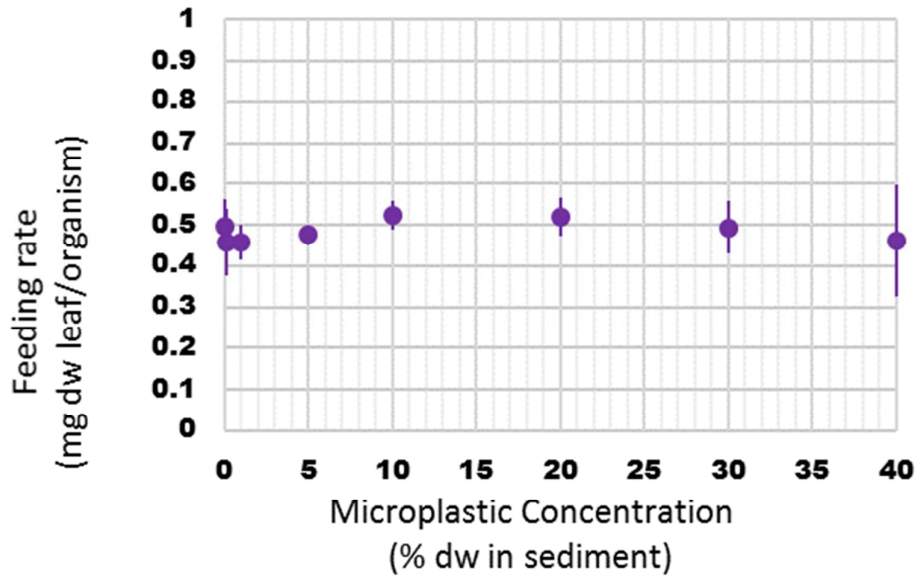

**Figure S4C.** Mean feeding rate ( $\pm$ s.d.) as mg dw of *Populus spp.* leaves consumed per organism of *A. aquaticus* per day during the 28-d exposure to PS microplastic concentrations ranging from 0 to 40 % in sediment (dw).

A) *Tubifex spp.*

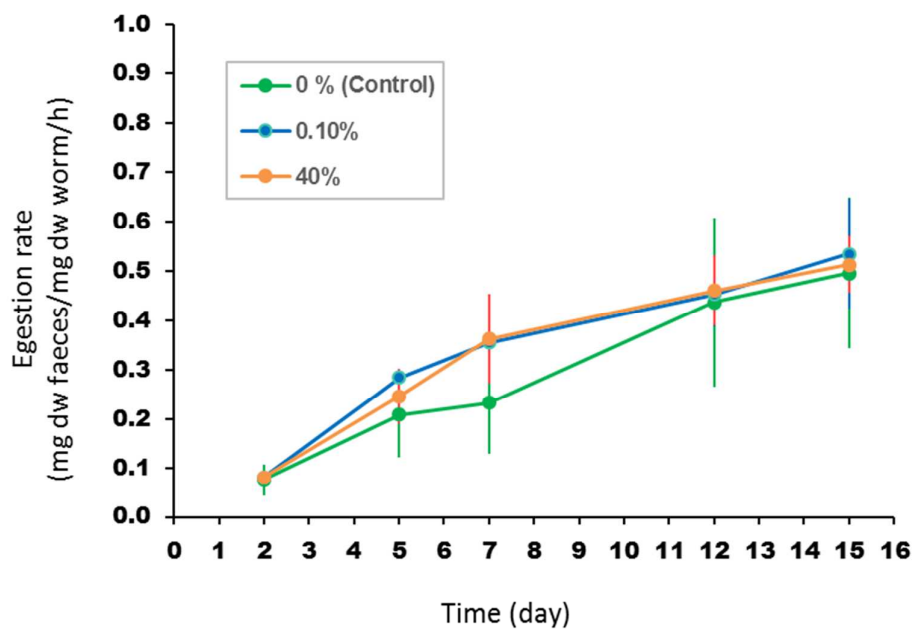

**Figure S5A.** Mean egestion rate ( $\pm$ SD) as mg dw of faeces egested per organism per day for *Tubifex spp.* (A) during a 15-d exposure to PS microplastic concentrations ranging from 0 to 40 % in sediment (dw).

B) *Lumbricus variegatus*

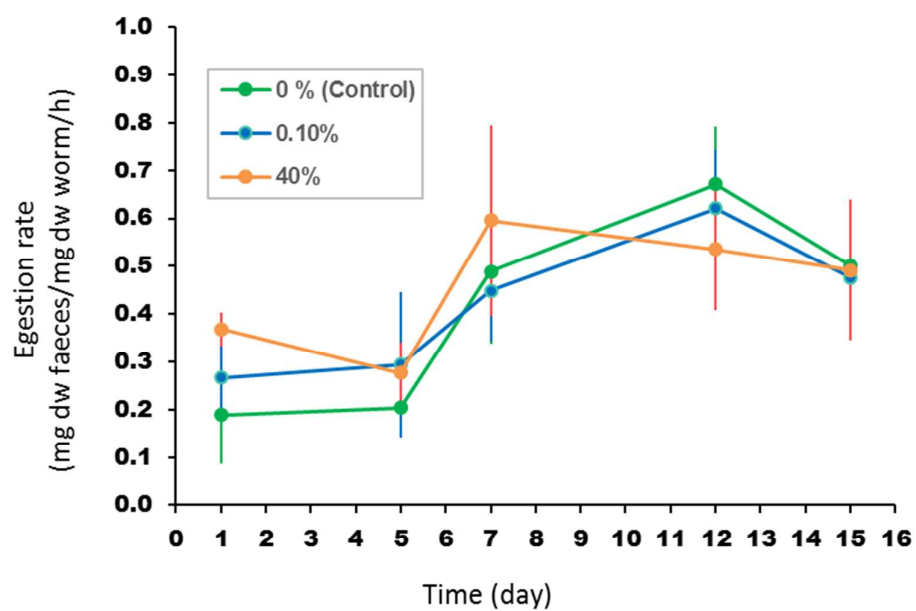

**Figure S5B.** Mean egestion rate ( $\pm$ SD) as mg dw of faeces egested per organism per day for *L. variegatus* (B) during a 15-d exposure to PS microplastic concentrations ranging from 0 to 40 % in sediment (dw).

A)

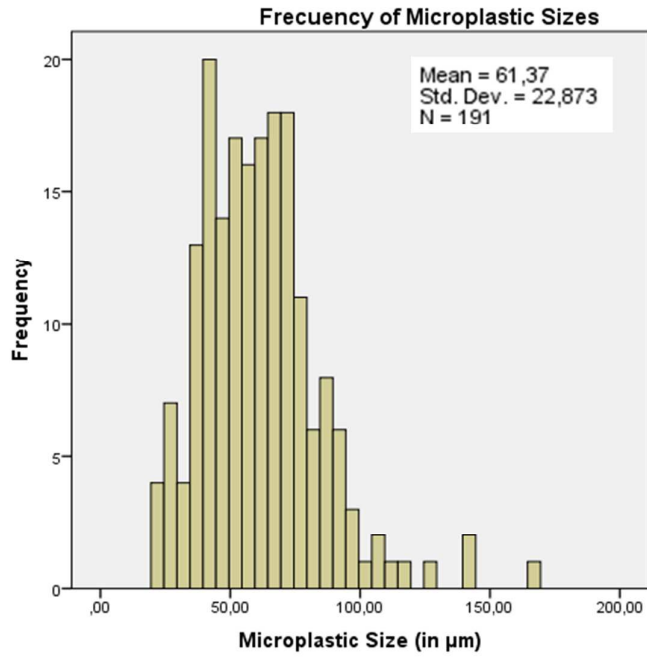

**Figure S6A.** Size Frequency of Retained Microplastics.

B)

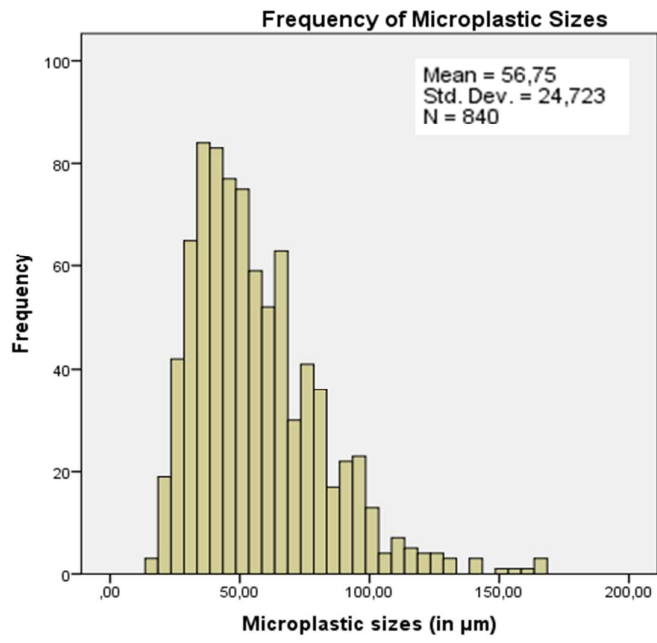

Figure S6B. Size Frequency of Egested Microplastics.

C)

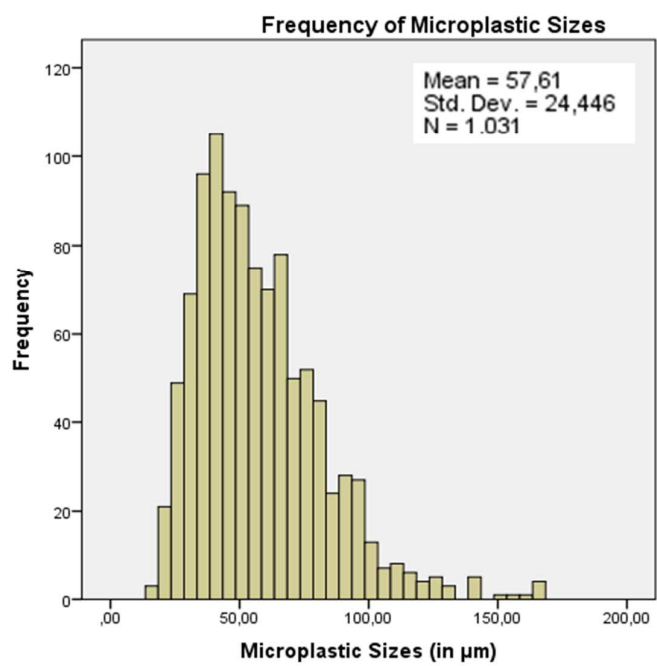

Figure S6C. Size Frequency of Total Ingested Microplastics (sum of A and B).



A)

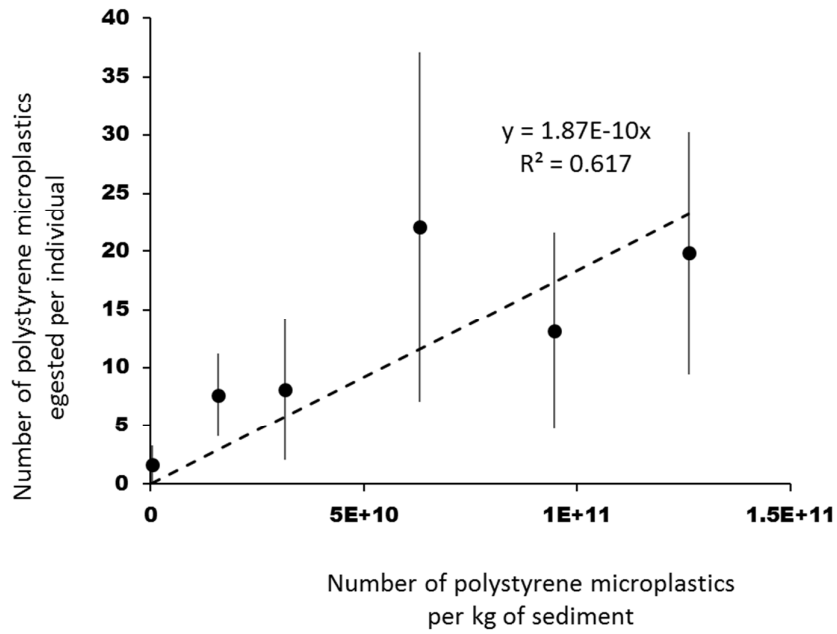

**Figure S7A.** Mean microplastic concentration (n=4) per individual of *G. pulex* ( $\pm$ s.d) at increasing microplastic concentrations in sediment as number of microplastics egested per organism by number of microplastics per kg of sediment (dw).

B)

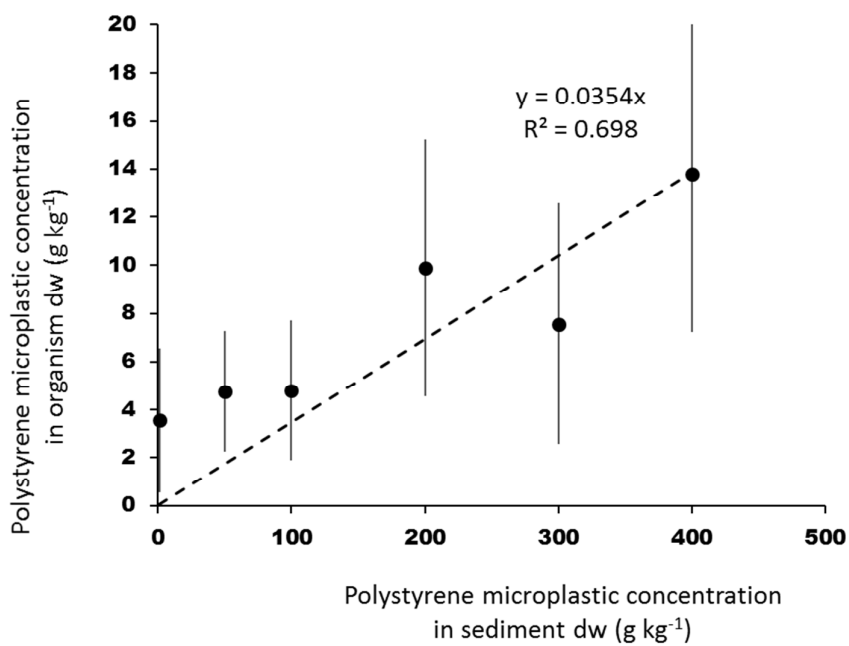

**Figure S7.** Mean microplastic concentration (n=4) per individual of *G. pulex* ( $\pm$ s.d) at increasing microplastic concentrations in sediment as: g kg<sup>-1</sup> of microplastics egested per organism dw by g kg<sup>-1</sup> of microplastics per sediment (dw).

## Literature

- (1) Andrady, A. L. Microplastics in the marine environment. *Mar. Pollut. Bull.* **2011**, 62 (8), 1596–1605.
- (2) Lijzen, J. P. A.; Baars, A. J.; Otte, P. F.; Rikken, M. G. J.; Swartjes, F. A.; Verbruggen, E. M. J.; Van Wezel, A. P. *RIVM report 711701 023. Technical evaluation of the Intervention Values for Soil/sediment and Groundwater Human and ecotoxicological risk assessment and derivation of risk limits for soil, aquatic sediment and groundwater*; 2001.
